# Supplementary material
Source: PubMed Central journal article supplement (PMC7430065)
Supplement: NIHMS1612462-supplement-Permission_-_Figure_2B.pdf [file NIHMS1612462-supplement-Permission_-_Figure_2B.pdf]

OXFORD UNIVERSITY PRESS LICENSE  
TERMS AND CONDITIONS

Apr 12, 2020

---

---

This Agreement between Massachusetts General Hospital -- Michael Osborne ("You") and Oxford University Press ("Oxford University Press") consists of your license details and the terms and conditions provided by Oxford University Press and Copyright Clearance Center.

**All payments must be made in full to CCC. For payment instructions, please see information listed at the bottom of this form.**

License Number

4806751290914

License date

Apr 12, 2020

Licensed Content Publisher

Oxford University Press

Licensed Content Publication

European Heart Journal

Licensed Content Title

Risk factors for myocardial infarction in women and men: insights from the INTERHEART study

Licensed Content Author

Anand, Sonia S.; Islam, Shofiquel

Licensed Content Date

Mar 10, 2008

Licensed Content Volume

29

Licensed Content Issue

7

Type of Use

Journal

Requestor type

Educational Institution/Non-commercial/ Not for-profit

Pharmaceutical support or sponsorship for this project

No

Format

Print and electronic

Portion

Figure/table

Number of figures/tables

1

Will you be translating?

No

Circulation/distribution

5000

Title of new article

Evaluating the Link between Psychosocial Stress and Cardiovascular Disease

Lead author

Michael T. Osborne

Title of targeted journal

Circulation: Cardiovascular Imaging

Publisher

American Heart Association

Expected publication date

Jun 2020

Portions

Figure 1

Requestor Location

Massachusetts General Hospital  
55 Fruit St

BOSTON, MA 02114  
United States  
Attn: Massachusetts General Hospital

Publisher Tax ID

GB125506730

Billing Type

Invoice

Billing Address

Massachusetts General Hospital  
55 Fruit St

BOSTON, MA 02114  
United States  
Attn: Massachusetts General Hospital

Total

106.50 USD

Terms and Conditions

**STANDARD TERMS AND CONDITIONS FOR REPRODUCTION OF MATERIAL  
FROM AN OXFORD UNIVERSITY PRESS JOURNAL**

1. Use of the material is restricted to the type of use specified in your order details.
2. This permission covers the use of the material in the English language in the following territory: world. If you have requested additional permission to translate this material, the terms and conditions of this reuse will be set out in clause 12.
3. This permission is limited to the particular use authorized in (1) above and does not allow you to sanction its use elsewhere in any other format other than specified above, nor does it apply to quotations, images, artistic works etc that have been reproduced from other sources which may be part of the material to be used.
4. No alteration, omission or addition is made to the material without our written consent. Permission must be re-cleared with Oxford University Press if/when you decide to reprint.
5. The following credit line appears wherever the material is used: author, title, journal, year, volume, issue number, pagination, by permission of Oxford University Press or the sponsoring society if the journal is a society journal. Where a journal is being published on behalf of a learned society, the details of that society must be included in the credit line.
6. For the reproduction of a full article from an Oxford University Press journal for whatever purpose, the corresponding author of the material concerned should be informed of the proposed use. Contact details for the corresponding authors of all Oxford University Press journal contact can be found alongside either the abstract or full text of the article concerned, accessible from [www.oxfordjournals.org](http://www.oxfordjournals.org) Should there be a problem clearing these rights, please contact [journals.permissions@oup.com](mailto:journals.permissions@oup.com)
7. If the credit line or acknowledgement in our publication indicates that any of the figures, images or photos was reproduced, drawn or modified from an earlier source it will be necessary for you to clear this permission with the original publisher as well. If this permission has not been obtained, please note that this material cannot be included in your publication/photocopies.
8. While you may exercise the rights licensed immediately upon issuance of the license at the end of the licensing process for the transaction, provided that you have disclosed complete and accurate details of your proposed use, no license is finally effective unless and until full payment is received from you (either by Oxford University Press or by Copyright Clearance Center (CCC)) as provided in CCC's Billing and Payment terms and conditions. If full payment is not received on a timely basis, then any license preliminarily granted shall be deemed automatically

revoked and shall be void as if never granted. Further, in the event that you breach any of these terms and conditions or any of CCC's Billing and Payment terms and conditions, the license is automatically revoked and shall be void as if never granted. Use of materials as described in a revoked license, as well as any use of the materials beyond the scope of an unrevoked license, may constitute copyright infringement and Oxford University Press reserves the right to take any and all action to protect its copyright in the materials.

9. This license is personal to you and may not be sublicensed, assigned or transferred by you to any other person without Oxford University Press's written permission.

10. Oxford University Press reserves all rights not specifically granted in the combination of (i) the license details provided by you and accepted in the course of this licensing transaction, (ii) these terms and conditions and (iii) CCC's Billing and Payment terms and conditions.

11. You hereby indemnify and agree to hold harmless Oxford University Press and CCC, and their respective officers, directors, employs and agents, from and against any and all claims arising out of your use of the licensed material other than as specifically authorized pursuant to this license.

12. Other Terms and Conditions:

v1.4

**You will be invoiced within 48 hours of this transaction date. You may pay your invoice by credit card upon receipt of the invoice for this transaction. Please follow instructions provided at that time.**

**To pay for this transaction now; please remit a copy of this document along with your payment. Payment should be in the form of a check or money order referencing your account number and this invoice number RLNK503500994.**

**Make payments to "COPYRIGHT CLEARANCE CENTER" and send to:**

**Copyright Clearance Center**

**29118 Network Place**

**Chicago, IL 60673-1291**

**Please disregard electronic and mailed copies if you remit payment in advance**

**Questions? [customercare@copyright.com](mailto:customercare@copyright.com) or +1-855-239-3415 (toll free in the US) or +1-978-646-2777.**

---

---
